# Supplementary material for: Conformational Response of Influenza A M2 Transmembrane Domain to Amantadine Drug Binding at Low pH (pH 5.5)
Source: PubMed Central journal article supplement (PMC4965473; doi:10.3389/fphys.2016.00317), 2016-07-29
Supplement: Presentation1.pdf [file Presentation1.pdf]

1 **Supplementary information**

2 **Conformational response of influenza A M2 transmembrane**  
3 **domain to amantadine drug binding at low pH (pH 5.5)**

4 Elka R. Georgieva<sup>1,2†\*</sup>, Peter P. Borbat<sup>1,2</sup>, Kirill Grushin<sup>3‡</sup>, Svetla Stoilova-McPhie<sup>3</sup>, Nichita J.  
5 Kulkarni<sup>4</sup>, Zhichun Liang<sup>1,2</sup>, Jack H. Freed<sup>1,2\*</sup>

6  
7  
8 <sup>1</sup> Department of Chemistry and Chemical Biology and <sup>2</sup> National Biomedical Center for Advanced  
9 ESR Technology, Ithaca, NY, USA

10 <sup>3</sup> Department of Neuroscience and Cell Biology, Sealy Center for Structural Biology and  
11 Molecular Biophysics, University of Texas Medical Branch at Galveston, Galveston, TX, USA

12 <sup>4</sup> College of Art and Sciences, Cornell University, Ithaca, NY, USA

13  
14  
15 \*Correspondence

16 Elka R. Georgieva  
17 [erg54@cornell.edu](mailto:erg54@cornell.edu)

18  
19 Jack H. Freed  
20 [jhf3@cornell.edu](mailto:jhf3@cornell.edu)

21  
22  
23  
24 † Present address: Department of Physiology and Biophysics, Weill Cornell Medicine, New York,  
25 NY, USA

26 ‡ Present address: Department of Cell Biology, School of Medicine, Yale University, New Haven,  
27 CT, USA

28

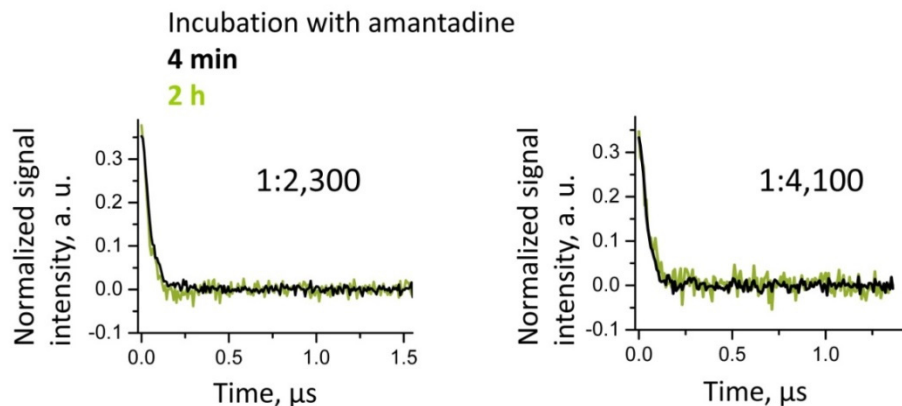

29  
 30 **Supplementary Figure 1.** DEER signal dependence on incubation time after the addition of  
 31 amantadine. Background-subtracted and normalized time-domain DEER data for spin-labeled  
 32 M2TMD<sub>21-49</sub> in DOPC/POPS at P/L's of 1:2,300 and 1:4,100 incubated with 2 mM amantadine  
 33 for 4 min (the standard incubation time for this study, cf. Experiment) and 2 h at room temperature  
 34 (RT). In both cases, after the standard procedure of intermolecular decay and constant background  
 35 removal (cf. Supplementary Fig. 2 below) no differences in the DEER modulation depth versus  
 36 incubation time could be noticed.

37  
 38  
 39

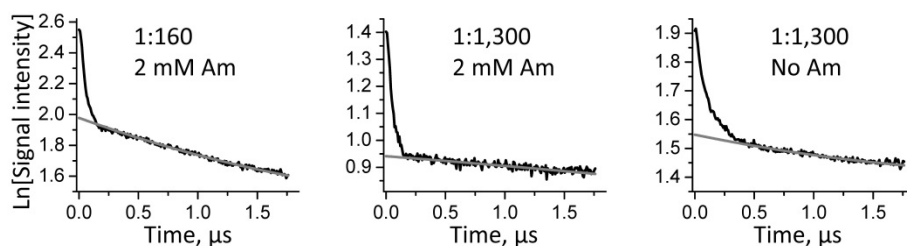

40  
 41 **Supplementary Figure 2.** Intermolecular decay removal by subtracting out a second-degree  
 42 polynomial fitted to the asymptotic background of logarithm of the primary DEER signal. After  
 43 taking the antilog of the remainder, the resulting intramolecular DEER signal,  $V(t)$  can be modified  
 44 as  $(V(t) - 1)/V(0)$  to give DEER modulation depth  $\Delta$  at zero evolution time and 0 asymptotically.  
 45 This is our preferred way to present DEER data. (Alternatively  $V(t)$  may be normalized to unity at  
 46 zero time to give  $1 - \Delta$  asymptotically, cf. Supplementary Fig. 6 below). This procedure of  
 47 background subtraction produces a small error in the DEER modulation depth of less than  $\pm 2.5\%$ ,  
 48 as found previously (Georgieva, Borbat et al. 2015). Data are shown for spin-labeled L46C residue  
 49 in DOPC/POPS-reconstituted M2TMD<sub>21-49</sub> at P/L's of 1:160 with amantadine, and 1:1,300 with  
 50 and without amantadine.

51  
 2

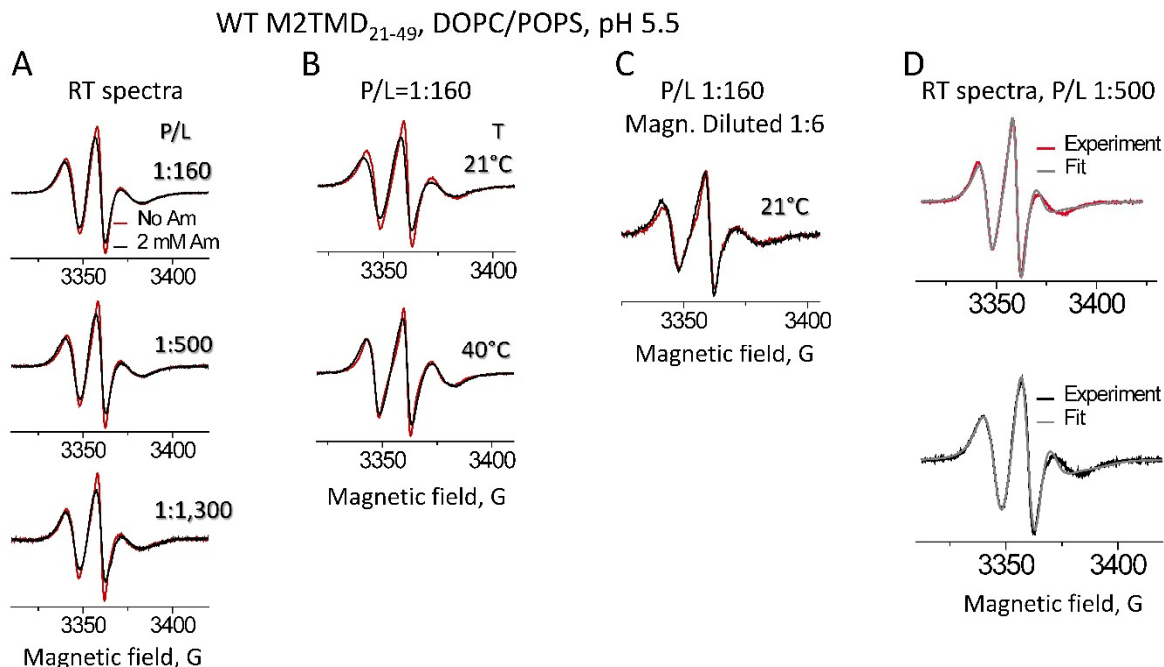

52

53 **Supplementary Figure 3.** The X-band (ca. 9.4 GHz) cw ESR spectra of wt M2TMD<sub>21-49</sub>, spin-  
 54 labeled at position L46C are shown. Data with and without amantadine are drawn in black and red  
 55 colors, respectively. **A)** Spectra recorded at room temperature (ca. 25 °C) for M2TMD<sub>21-49</sub> in  
 56 DOPC/POPS for P/L's 1:160, 1:500 and 1:1,300. **B)** The spectra for P/L of 1:160 at controlled  
 57 temperatures of 21 °C and 40 °C. **C)** ESR spectra recorded at 21 °C on M2TMD<sub>21-49</sub> magnetically  
 58 diluted by the 1:6 ratio of spin-labeled to unlabeled peptide. The cw ESR lineshape broadening  
 59 occurs upon the addition of amantadine, indicating drug-induced change in the spin-label motional  
 60 dynamics. This broadening persists even in the spectra recorded at 40 °C and also in the  
 61 magnetically diluted sample, (i.e. it is unrelated to dipole-dipole coupling). **D)** To better understand  
 62 these effects, we applied the MOMD NLLS spectral fitting (Budil, Lee et al. 1996) to the RT  
 63 spectra for P/L's of 1:500 and 1:1,300 to determine the rotational correlation time,  $\tau_c$  and the order  
 64 parameter,  $S_{20}$ . In all cases, we obtained the best fit for  $\tau_c = 2.3$  ns. However,  $S_{20}$  increased for the  
 65 samples with amantadine:  $S_{20} = 0.11$  for apo vs.  $S_{20} = 0.18$  for the drug-bound M2TMD<sub>21-49</sub> for  
 66 both P/L's of 1:1,300 and 1:500, suggesting more space restricted spin-label motion was imposed  
 67 by amantadine-induced structural changes.

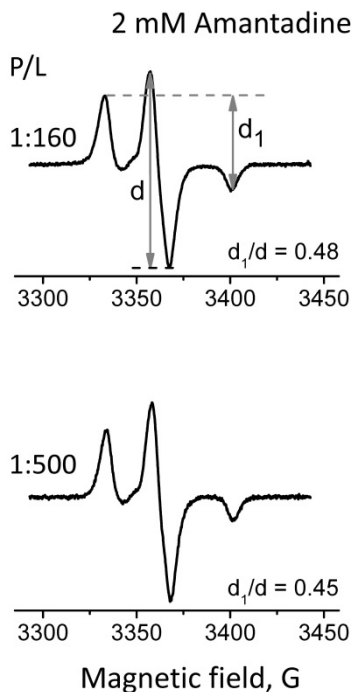

68

69 **Supplementary Figure 4.** Low temperature (163 K) X-band (ca. 9.4 GHz) cw ESR spectra of  
 70 spin-labeled L46C residue for amantadine-bound M2TMD<sub>21-49</sub> in DOPC/POPS membranes. The  
 71  $d_1/d$  parameter was used to test the presence of inter-spin distances less than 2 nm (Kokorin 2012,  
 72 p. 113-164). The inter-spin distance of 1.89 nm corresponds to  $d_1/d$  of 0.54, whereas smaller  $d_1/d$   
 73 values correspond to distances longer than 2 nm. Here, for amantadine-bound M2TMD<sub>21-49</sub> we  
 74 obtained  $d_1/d$  parameter less than 0.48, indicating that the distances are well within the range of  
 75 DEER method, i.e. 1.7 nm. This fact also holds for amantadine-free M2TMD<sub>21-49</sub>, since in the  
 76 previous study we found  $d_1/d \leq 0.51$ ; the conclusion was further reinforced by double-quantum  
 77 coherence ESR (DQC) conducted on magnetically diluted sample, showing a negligible content  
 78 of distances shorter than 1.7 nm (Georgieva, Borbat et al. 2015).

79

80

81

82

83

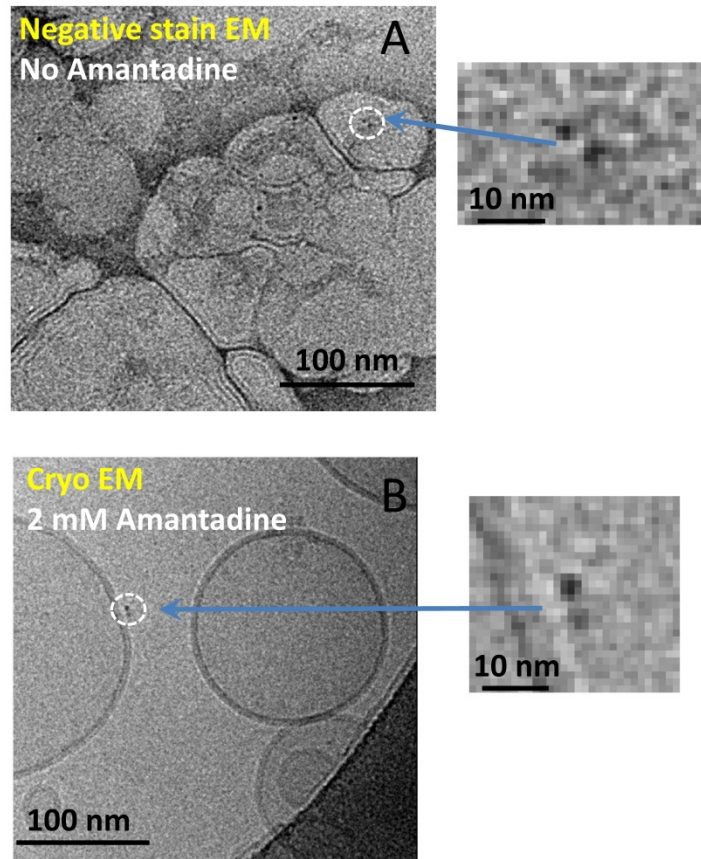

84

85 **Supplementary Figure 5.** EM micrographs of M2TMD<sub>21-49</sub> labeled with gold nanoparticles at  
86 position L46C and reconstituted into DOPC/POPS membranes. EM micrographs, both negative  
87 stain TEM shown in panel **A** and cryoEM shown in panel **B** demonstrate very high resolution.

88

89

90

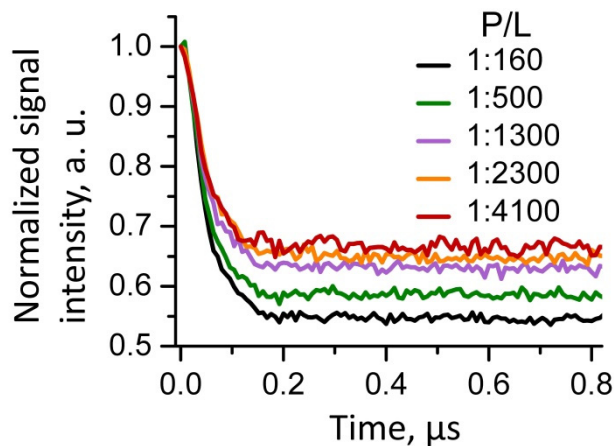

91

92 **Supplementary Figure 6.** The background-corrected and normalized to unity at zero time DEER  
 93 data from spin-labeled M2TMD<sub>21-49</sub> in DOPC/POPS with the addition of 2 mM amantadine are  
 94 plotted for several P/L's of 1:4,100, 1:2,300, 1:1,300, 1:500, and 1:160. The DEER modulation  
 95 depth increases monotonically with P/L. Only the early 0.8 μs of the DEER data are shown for  
 96 clarity.

97

98

99

## 100 **Supplementary references**

- 101 Budil, D. E., S. Lee, S. Saxena and J. H. Freed. "Nonlinear-least-squares analysis of slow-motion EPR  
 102 spectra in one and two dimensions using a modified Levenberg-Marquard algorithm." *Journal of*  
 103 *Magnetic Resonance* (1996) **120**: 155-189.
- 104 Georgieva, E. R., P. P. Borbat, H. D. Norman and J. H. Freed. "Mechanism of influenza A M2  
 105 transmembrane domain assembly in lipid membranes." *Sci Rep* (2015) **5**: 11757.
- 106 Kokorin, A. I. (2012, p. 113-164). Forty years of the d1/d parameter. A. I. Kokorin, InTech.
